# Supplementary material
Source: PubMed Central journal article supplement (PMC117425)

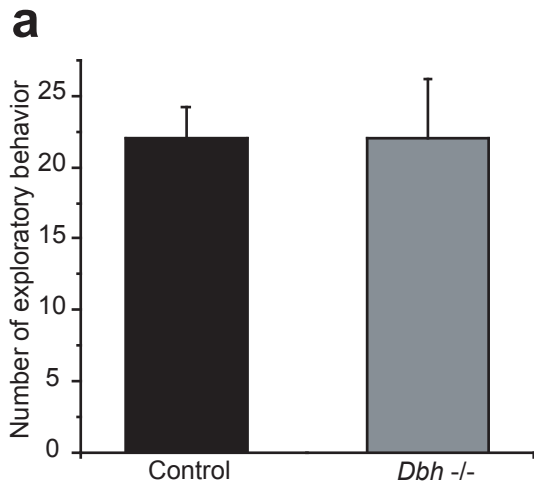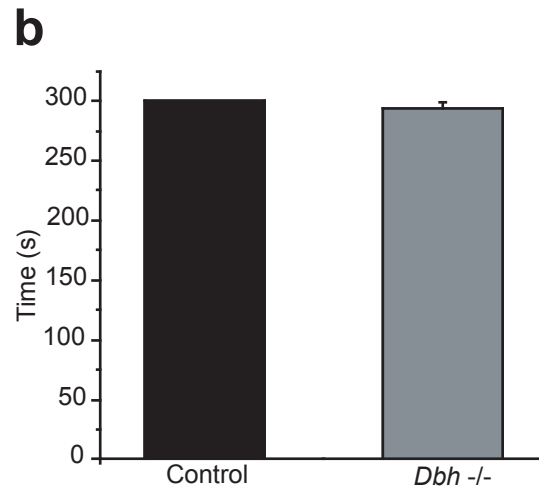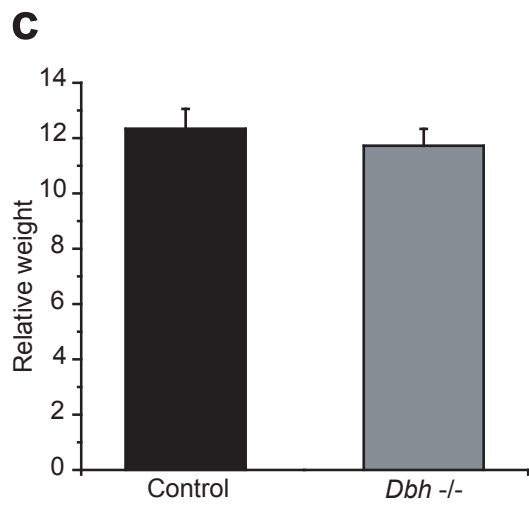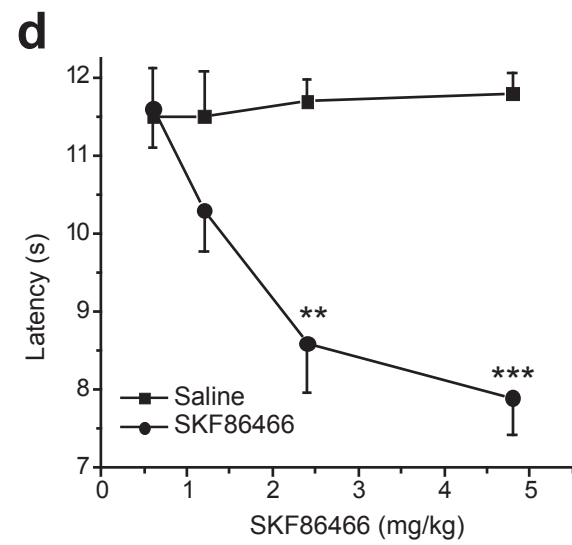

Supplement: pnas_99_2_1029__3.pdf [file pnas_99_2_1029__3.pdf]

AADC

scp

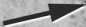

Supplement: pnas_99_2_1029__4.pdf [file pnas_99_2_1029__4.pdf]
